# Supplementary material for: Extracellular vesicles from UTX-knockout endothelial cells boost neural stem cell differentiation in spinal cord injury
Source: Springer Nature journal article supplement (doi:10.1186/s12964-023-01434-4), 2024-02-29

**Fig 3H**

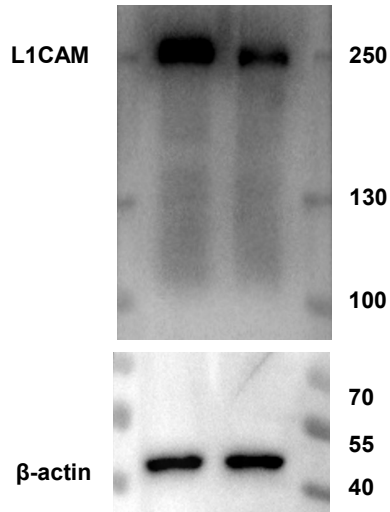

**Fig 5F**

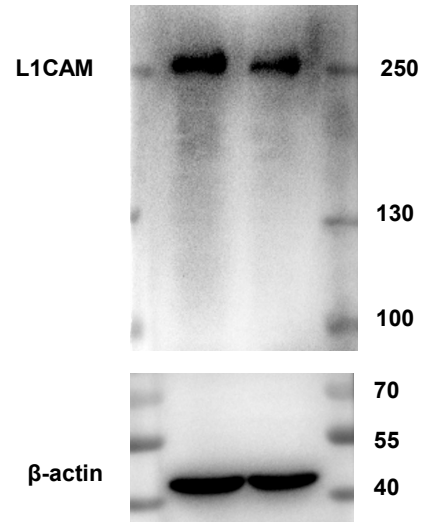

**Fig 7A**

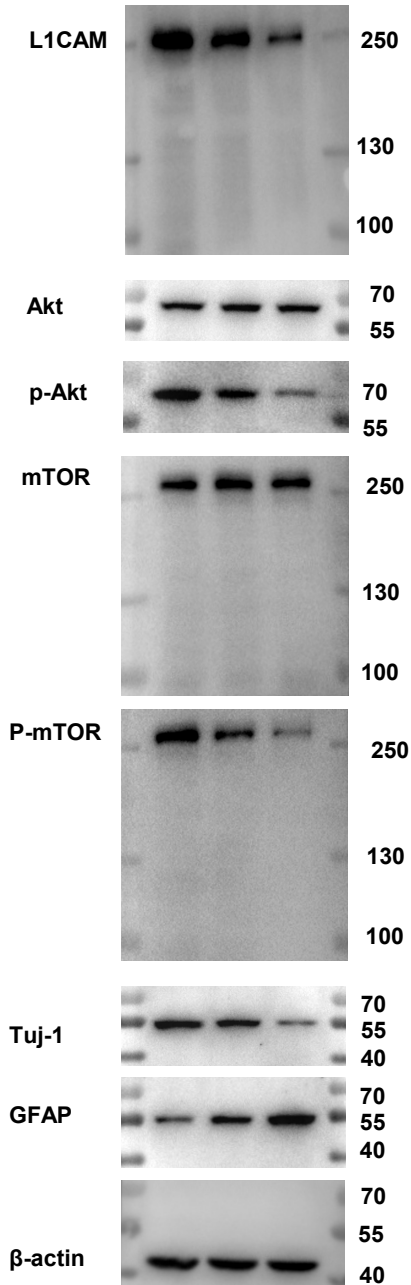

**Fig 7D**

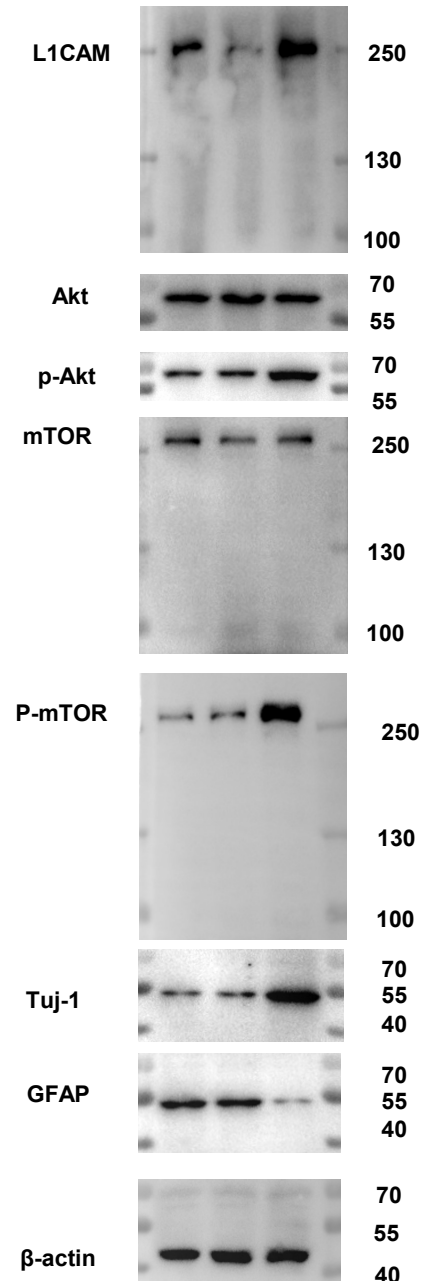

Supplement: 12964_2023_1434_MOESM2_ESM.pdf [file 12964_2023_1434_MOESM2_ESM.pdf]
